# Supplementary material
Source: PubMed Central journal article supplement (PMC4061768)
Supplement: NIHMS559958-supplement-302562R2_Acknowledgement_Permissions.pdf [file NIHMS559958-supplement-302562R2_Acknowledgement_Permissions.pdf]

## Lorenzo Thomas

---

**From:** Ola Martin  
**Sent:** Wednesday, September 04, 2013 2:53 PM  
**To:** Lorenzo Thomas  
**Subject:** FW: Acknowledgments section

**From:** Ashley Gabriel [<mailto:laurenashleygabriel@gmail.com>]  
**Sent:** Sunday, August 25, 2013 11:05 PM  
**To:** Ola Martin  
**Subject:** Re: Acknowledgments section

Hi Ola,

It's nice to hear from you. Congratulations on the upcoming manuscript submission! Yes, you have my written permission to include me in the acknowledgments section.

Medical school is going well! I've never studied so hard but I absolutely love it. I hope all is well with you and your family :)

Ashley

On Sun, Aug 25, 2013 at 4:51 PM, Ola Martin <[omartin@sanfordburnham.org](mailto:omartin@sanfordburnham.org)> wrote:

Hi Ashley,

I hope you are doing well. We are submitting my manuscript entitled “A Role for PGC-1 Coactivators in Mitochondrial Maturation

and Dynamics during Postnatal Cardiac Development “ to Circulation Research. We are listing you in the Acknowledgments section for your contribution to the Animal work. The journal requires that we have your written permission in order to name you in this section. Please let me know if you have any concerns or if this is ok with you.

Thanks,

Ola

## Lorenzo Thomas

---

**From:** Ola Martin  
**Sent:** Wednesday, September 04, 2013 3:32 PM  
**To:** Lorenzo Thomas  
**Subject:** FW: Acknowledgments for manuscript

---

**From:** Rick Vega  
**Sent:** Wednesday, September 4, 2013 3:20 PM  
**To:** Ola Martin  
**Subject:** Re: Acknowledgments for manuscript

Hi Ola,

Thank you for the recognition and I give my permission for my name to be listed under the Acknowledgement section of your manuscript.

Rick

Rick Vega, Ph.D.  
Research Assistant Professor  
Sanford-Burnham Medical Research Institute at Lake Nona  
6400 Sanger Road, Orlando FL 32827  
(407) 745-2126  
[rvega@sanfordburnham.org](mailto:rvega@sanfordburnham.org)

---

**From:** Ola Martin <[omartin@sanfordburnham.org](mailto:omartin@sanfordburnham.org)>  
**Date:** Wed, 4 Sep 2013 14:52:08 -0400  
**To:** Rick Vega <[rvega@sanfordburnham.org](mailto:rvega@sanfordburnham.org)>  
**Subject:** Acknowledgments for manuscript

Hi Rick,

As you know we are submitting my manuscript entitled “A Role for PGC-1 Coactivators in the Control of Mitochondrial Dynamics during Postnatal Cardiac Growth” to Circulation Research. We are listing you in the Acknowledgments section for critical reading of the manuscript. The journal requires that we have your written permission in order to name you in this section. Please let me know that this is ok with you.

Thanks,

Ola

## Lorenzo Thomas

---

**From:** Lorenzo Thomas  
**Sent:** Wednesday, September 04, 2013 2:58 PM  
**To:** Ola Martin  
**Subject:** RE: Acknowledgments for manuscript

Hi Ola,

Yes, you have my permission to list my name in the Acknowledgments section.

Thank you,  
Lorenzo

**Lorenzo Thomas** | Research Administrative Coordinator to  
Daniel P. Kelly, M.D., Professor and Scientific Director  
**SANFORD-BURNHAM MEDICAL RESEARCH INSTITUTE at Lake Nona**  
6400 Sanger Road, Orlando, FL 32827  
Phone: (407) 745-2136  
Fax: (407) 745-2019  
[lthomas@sanfordburnham.org](mailto:lthomas@sanfordburnham.org) | [www.sanfordburnham.org](http://www.sanfordburnham.org)

---

**From:** Ola Martin  
**Sent:** Wednesday, September 04, 2013 2:51 PM  
**To:** Lorenzo Thomas  
**Subject:** Acknowledgments for manuscript

Hi Lorenzo,

As you know, we are submitting my manuscript entitled “A Role for PGC-1 Coactivators in the Control of Mitochondrial Dynamics during Postnatal Cardiac Growth” to Circulation Research. We are listing you in the Acknowledgments section for your assistance in preparation of the manuscript. The journal requires that we have your written permission in order to name you in this section. Please let me know that this is ok with you.

Thanks,

Ola

## Lorenzo Thomas

---

**From:** Ola Martin  
**Sent:** Wednesday, September 04, 2013 2:53 PM  
**To:** Lorenzo Thomas  
**Subject:** FW: Acknowledgments section

---

**From:** Juliet Fong [<mailto:Juliet.Fong@UTSouthwestern.edu>]  
**Sent:** Sunday, August 25, 2013 6:15 PM  
**To:** Ola Martin  
**Subject:** Re: Acknowledgments section

Ola -

Congrats on getting your story out! Thanks for acknowledging my contributions - I appreciate it! ;) I'll keep my fingers crossed for you for easily addressable reviewer concerns. Good luck!

Hope Chris and the kiddos are doing well!  
Juliet

Sent from my iPhone

On Aug 25, 2013, at 3:53 PM, "Ola Martin" <[omartin@sanfordburnham.org](mailto:omartin@sanfordburnham.org)> wrote:

Hi Juliet,

I hope you are doing well. We are submitting my manuscript entitled "A Role for PGC-1 Coactivators in Mitochondrial Maturation and Dynamics during Postnatal Cardiac Development" to Circulation Research. We are listing you in the Acknowledgments section for your contribution to the animal work. The journal requires that we have your written permission in order to name you in this section. Please let me know if you have any concerns or if this is ok with you.

Thanks,  
Ola

---

UT Southwestern Medical Center  
The future of medicine, today.

## Lorenzo Thomas

---

**From:** Ola Martin  
**Sent:** Wednesday, September 04, 2013 2:53 PM  
**To:** Lorenzo Thomas  
**Subject:** FW: acknowledgments section

---

**From:** Jian-Liang Li  
**Sent:** Monday, August 26, 2013 11:37 AM  
**To:** Ola Martin  
**Subject:** RE: acknowledgments section

Hi Ola

Sure, could you also put the core information if possible? Such as: Jian-Liang Li at Lake Nona Bioinformatics core

Thanks,

Jason

---

**From:** Ola Martin  
**Sent:** Sunday, August 25, 2013 5:03 PM  
**To:** Jian-Liang Li  
**Subject:** acknowledgments section

Hi Jason,

I want to thank you for all your help with the Mfn1 promoter analysis. We are now submitting a manuscript entitled "A Role for PGC-1 Coactivators in Mitochondrial Maturation and Dynamics during Postnatal Cardiac Development", which includes some of this work, to Circulation Research. We are listing you in the Acknowledgments section for your contribution. The journal requires that we have your written permission in order to name you in this section. Please let me know if you have any concerns or if this is ok with you.

Thanks,  
Ola

## Lorenzo Thomas

---

**From:** Ola Martin  
**Sent:** Wednesday, September 04, 2013 2:53 PM  
**To:** Lorenzo Thomas  
**Subject:** FW: acknowledgments

---

**From:** [drcollia@att.net](mailto:drcollia@att.net) [<mailto:drcollia@att.net>]  
**Sent:** Sunday, August 25, 2013 5:53 PM  
**To:** Ola Martin  
**Subject:** Re: acknowledgments

Hi Ola,

That is fine with me. Congratulations on your publication! I know you have put a lot of work into that project. Send me a copy when you can. I would like to read it.

Deanna

----- Reply message -----

**From:** "Ola Martin" <[omartin@sanfordburnham.org](mailto:omartin@sanfordburnham.org)>  
**To:** "[drcollia@att.net](mailto:drcollia@att.net)" <[drcollia@att.net](mailto:drcollia@att.net)>  
**Subject:** acknowledgments  
**Date:** Sun, Aug 25, 2013 1:50 pm

Hi Deanna,

I hope you are doing well. We are submitting my manuscript entitled "A Role for PGC-1 Coactivators in Mitochondrial Maturation and Dynamics during Postnatal Cardiac Development" to Circulation Research. We are listing you in the Acknowledgments section for your contribution to the animal work. The journal requires that we have your written permission in order to name you in this section. Please let me know if you have any concerns or if this is ok with you.

Thanks,  
Ola

## Lorenzo Thomas

---

**From:** Ola Martin  
**Sent:** Wednesday, September 04, 2013 2:53 PM  
**To:** Lorenzo Thomas  
**Subject:** FW: acknowledgments

---

**From:** Cori Riggs [<mailto:cori4realestate@hotmail.com>]

**Sent:** Monday, August 26, 2013 4:17 PM

**To:** Ola Martin

**Subject:** RE: acknowledgments

Hi Ola,

It was wonderful hearing from you. Hope all is going well. Yes, you have my permission to list my name in the Acknowledgments section. If you need me to sign a form, just email it to me. Hello to all!!

Thanks,

Cori

---

**From:** Ola Martin [<mailto:omartin@sanfordburnham.org>]

**Sent:** Sunday, August 25, 2013 4:51 PM

**To:** [cori4realestate@hotmail.com](mailto:cori4realestate@hotmail.com)

**Subject:** acknowledgments

Hi Cori,

I hope you are doing well. We are submitting my manuscript entitled "A Role for PGC-1 Coactivators in Mitochondrial Maturation and Dynamics during Postnatal Cardiac Development" to Circulation Research. We are listing you in the Acknowledgments section for your contribution to the animal work. The journal requires that we have your written permission in order to name you in this section. Please let me know if you have any concerns or if this is ok with you.

Thanks,

Ola

## Lorenzo Thomas

---

**From:** Ola Martin  
**Sent:** Wednesday, September 04, 2013 2:53 PM  
**To:** Lorenzo Thomas  
**Subject:** FW: acknowledgments for manuscript

---

**From:** Beatrice Alvarado [<mailto:bealvara@gmail.com>]  
**Sent:** Monday, August 26, 2013 10:27 AM  
**To:** Ola Martin  
**Subject:** Re: acknowledgments for manuscript

Hi Ola!

I'm definitely okay with this :) thanks so much, and best of luck with the manuscript! Hope all is well and regards to all over there!

Beatrice

Sent from my iPhone

On Aug 25, 2013, at 4:48 PM, Ola Martin <[omartin@sanfordburnham.org](mailto:omartin@sanfordburnham.org)> wrote:

Hi Beatrice,

I hope you are doing well. We are submitting my manuscript entitled “A Role for PGC-1 Coactivators in Mitochondrial Maturation

and Dynamics during Postnatal Cardiac Development “ to Circulation Research. We are listing you in the Acknowledgments section for your contribution to the Animal work. The journal requires that we have your written permission in order to name you in this section. Please let me know if you have any concerns or if this is ok with you.

Thanks,

Ola
