# Supplementary material
Source: PubMed Central journal article supplement (PMC4061768)
Supplement: NIHMS559958-supplement-302562R2_Online_data_supplement.pdf [file NIHMS559958-supplement-302562R2_Online_data_supplement.pdf]

## SUPPLEMENTAL MATERIAL

### Detailed Methods

#### *Animal Studies*

Generation of PGC-1 $\alpha$ <sup>-/-</sup> $\beta$ <sup>f/f/MCK-Cre</sup> mice was previously described.<sup>1</sup> Briefly, PGC-1 $\beta$ <sup>f/f</sup> mice<sup>2</sup> were crossed with mice expressing Cre under control of a MCK promoter<sup>3</sup> to achieve muscle-specific deletion of PGC-1 $\beta$ . These mice in turn were crossed to obtain mice homozygous for the loss of PGC-1 $\alpha$ <sup>4</sup> and the PGC-1 $\beta$  flox allele (PGC-1 $\alpha$ <sup>-/-</sup> $\beta$ <sup>f/f</sup> mice), with and without MCK-Cre. PGC-1 $\beta$ <sup>f/f</sup> and PGC-1 $\beta$ <sup>f/f/MCK-Cre</sup> mice were generated from the same breeding pairs, while PGC-1 $\alpha$ <sup>-/-</sup> $\beta$ <sup>f/f</sup> and PGC-1 $\alpha$ <sup>-/-</sup> $\beta$ <sup>f/f/MCK-Cre</sup> mice were generated from a different set of breeding pairs.

The tamoxifen-inducible, heart-specific, double PGC-1 $\alpha$  and  $\beta$  knockout mouse (PGC-1 $\alpha$ <sup>-/-</sup> $\beta$ <sup>f/f/MerCre</sup>) was generated by the same breeding scheme as the PGC-1 $\alpha$ <sup>-/-</sup> $\beta$ <sup>f/f/MCK-Cre</sup> mice described above, using the mutated estrogen receptor-Cre recombinase fusion protein under control of alpha-myosin heavy chain (MHC) promoter (MHC-MerCre, provided by Dr. Jeff Molkentin, U. of Cincinnati), to cause a cardiac-specific deletion of PGC-1 $\beta$ .

At 2 months of age, PGC-1 $\alpha$ <sup>-/-</sup> $\beta$ <sup>f/f/MerCre</sup> mice were injected on two sequential days with 50mg/kg/day of tamoxifen (T5648, Sigma) dissolved in sunflower seed oil (S5007, Sigma) to translocate Cre into the nucleus and create adult PGC-1 $\alpha$ / $\beta$  deficient mice (PGC-1 $\alpha$ / $\beta$ <sup>-/-</sup>). The following control animals were used for the adult model experiments. For wild-type control mice (PGC-1 $\alpha$ / $\beta$ <sup>+/+</sup>), a mix of tamoxifen injected PGC-1 $\beta$ <sup>f/f</sup> and vehicle injected PGC-1 $\beta$ <sup>f/f/MerCre</sup> mice were used. For PGC-1 $\alpha$  single knockout mice (PGC-1 $\alpha$ <sup>-/-</sup>), a mix of tamoxifen injected PGC-1 $\alpha$ <sup>-/-</sup> $\beta$ <sup>f/f</sup> and vehicle injected PGC-1 $\alpha$ <sup>-/-</sup> $\beta$ <sup>f/f/MerCre</sup> mice were used unless otherwise specified. All PGC-1 $\beta$  single knockout mice (PGC-1 $\beta$ <sup>-/-</sup>) were tamoxifen injected PGC-1 $\beta$ <sup>f/f/MerCre</sup> mice. All endpoint measurements were made 1 month after injection unless otherwise noted.

#### *Echocardiography*

Serial ultrasound examination of the heart was performed non-invasively using a Vevo2100 Microultrasound System (VisualSonics Inc, Toronto, Ontario, Canada) as we have described.<sup>2</sup> 1 week old mice were lightly anesthetized with isoflurane (3% induction and 1% maintenance). Adult mice (4 and 8 weeks) were anesthetized with intraperitoneal injection of 0.01 ml/g of 2% Avertin (tribromoethanol). Importantly, low-dose Avertin does not exert significant negative inotropic or chronotropic effects. Hair was removed from the anterior chest in adult mice using chemical hair remover and the animals were placed on a warming pad in a left lateral decubitus position to maintain normothermia (around 37°C). Ultrasound gel was applied to the chest. cursory examination of cardiac structure and function under physiologic conditions was obtained by hand-held manipulation of the ultrasound transducer (30-60 MHz) to obtain 2D and 2-D guided M-mode images. Physiologic parameters including heart rate, respiratory rate, and core body temperature were continuously monitored by a built-in monitoring system. Care was taken to maintain adequate contact while avoiding excessive pressure on the chest. All the echocardiographic images were analyzed by the analysis software of Vevo 2100. Measurement of wall thickness and luminal diameters (interventricular septum, IVS; left ventricle posterior wall, LVPW; left ventricle internal luminal diameters, LVID) were made from M-mode images of the left ventricle in both systole (s) and diastole (d) following the guidelines of American Society of Echocardiography.<sup>5</sup> Left ventricular fractional shortening (LV FS%) and ejection fraction (EF %), a measure of systolic function, were calculated as: LV FS(%) = [(LVIDd-LVIDs)/LVIDd]x100;<sup>6</sup> Ejection fraction was calculated according to Teichholz, (LV-EF%) = [(LVEDV-LVESV)/LVEDV]x100;<sup>7</sup> Left ventricular mass (LVM) was calculated as: [(IVSd+LVIDd+LVPWd)3-(LVIDd)3]x1.04.<sup>6</sup>

### *Mitochondrial respiration studies*

For the PGC-1 $\alpha$ <sup>-/-</sup> $\beta$ <sup>f/f</sup>/MCK-Cre mice and their controls, respiratory function was assessed for mitochondria isolated from combined left and right cardiac ventricles using a previously described isolation protocol.<sup>8,9</sup> Two hearts from 4 week-old sex matched mice were pooled per sample. Respiration measurements were conducted using an optical probe (Oxygen FOXY Probe, Ocean Optics) as described previously.<sup>2</sup> The respiration of the mitochondrial isolate containing 0.3 mg protein was measured at 37°C using an optical probe (Oxygen FOXY Probe, Ocean Optics). The respiration buffer<sup>10</sup> contained the following (in mM): 125 KCl, 20 HEPES, 3 Mg-acetate, 5 KH<sub>2</sub>PO<sub>4</sub>, 0.4 EGTA, and 0.3 DTT, pH 7.1 at 25°C, with 2 mg/ml BSA added. For palmitoyl-l-carnitine (PC) respiration, the respiration buffer also contained 20  $\mu$ M PC and 5 mM malate. For pyruvate respiration, the respiration buffer contained 10 mM pyruvate and 5 mM malate. Following measurement of basal respiration, state 3 (maximal ADP-stimulated) respiration was determined by exposing the mitochondria to 1 mM ADP. Uncoupled respiration was evaluated following addition of oligomycin (1  $\mu$ g/mL) to inhibit ATP synthase. Respiration rates were expressed as nanomoles of O<sub>2</sub> per minute per milligram of mitochondrial protein.

For the PGC-1 $\alpha$ <sup>-/-</sup> $\beta$ <sup>f/f</sup>/Mercre mice and their controls, mitochondrial function was assessed by measuring rates of O<sub>2</sub> consumption (OCR) in pmoles O<sub>2</sub>/min using a XF24 Extracellular Flux Analyzer (Seahorse Bioscience). Isolated mitochondria (4ug/well) in 1X MAS (70mM Sucrose, 220mM Mannitol, 5mM KH<sub>2</sub>PO<sub>4</sub>, 5mM MgCl<sub>2</sub>, 2mM HEPES, 1mM EGTA, 0.1% Fatty Acid Free BSA, pH7.2) were transferred to a 24-well plate. Substrates [pyruvate (5mM)/Malate (5mM)] were added to the well. During the OCR measurement, the compounds in 1 X MAS were injected as follows: Port A, 50ul of 40mM ADP; Port B, 55ul of 10ug/ml Oligomycin; Port C, 60ul of 20uM FCCP; Port D, 65ul of 15ug/ml antimycin A.

### *Electron microscopy*

For electron microscopic (EM) studies, mice were euthanized, cardiac tissue (cardiac papillary muscle for adult, and whole heart for neonates and 1 week-old pups) was harvested, and immediately immersed in Karnovsky's fixative (2% glutaraldehyde, 1% paraformaldehyde, and 0.08% sodium cacodylate) as previously described.<sup>2</sup> For neonates and 1 week-old pups, the left ventricular (LV) free wall was dissected postfixation. All samples were postfixed in 1% osmium tetroxide, embedded in Poly Bed plastic resin, and sectioned for electron microscopy by the Electron Microscopy Core Facility at Washington University School of Medicine. Electron micrographs were collected on the JEM-1011 electron microscope at the University of Central Florida and on the Philips Morgagni transmission electron microscope at the Sanford-Burnham Medical Research Institute (SBMRI) at Lake Nona.

### *Histological analysis*

Masson's Trichrome staining and Caspase staining was performed by the Histology Core at Sanford-Burnham Medical Research Institute at Lake Nona. The tissues were fixed with 10% buffered formalin overnight, dehydrated in 70% ethanol, and embedded in paraffin from which 6- $\mu$ m sections were prepared. Masson's Trichrome staining was performed using the Prisma automated slide stainer (Sakura Finetek) with G2 coverslipper. HALO software was used to quantitate the area of each field that is covered by blue staining vs. the area of the field covered by red staining. Three to eight fields per group were used. Caspase staining was performed using Cleaved Caspase 3 (Asp175) antibody (Cell Signaling #9661). Images were taken on a Nikon 80i Upright Microscope with a DS F-i1 2560x1920 CCD camera, using a Plan Fluor 10x 0.3 WD 16 DIC L/N1 or Plan Fluor 20x 0.5 WD 2.1 DIC M/N2 objective.

### *RNA analyses*

Total RNA was isolated from cardiac tissue using the RNeasy method (Tel-Test)<sup>2</sup> and from cultured cells using the RNeasy RNA isolation kit (Ambion) per the manufacturer's instruction. Real-time qRT-PCR was performed using the Stratagene MX3005P detection system and reagents supplied by Stratagene. Specific oligonucleotide primers for target gene sequences are listed in Online Table I. Arbitrary units of target mRNA were corrected to expression of *36b4*.

### *Promoter scanning and gene expression array studies*

The promoter regions for mitofusin 1 (*Mfn1*) mitofusin 2 (*Mfn2*), opticonatroph ( *Opa1*), dynamin-related protein 1 (*Drp1*), and fission protein 1 (*Fis1*) were retrieved from the DataBase of Transcriptional Start Sites (-2000 bp to + 500bp). All the alternative promoters were also retrieved. The estrogen-related receptor  $\alpha$  (ERR $\alpha$ ) motif profile was downloaded from the Transfac database 7.0 (public version). ERR $\alpha$  binding consensus sites were identified within the promoters listed above using visual scans in Vector NTI (Invitrogen), combined with TF searches using Aliggen-Promo and Clover<sup>11</sup> software. Conservation between species was determined using “blat” in the UCSC genome database.

Total RNA isolated from cardiac biventricle of 12-week-old PGC-1 $\alpha$ <sup>-/-</sup> $\beta$ <sup>fl/fl</sup>MerCre ( $\alpha\beta$ <sup>-/-</sup>) and PGC-1 $\alpha$ <sup>-/-</sup> ( $\alpha$ <sup>-/-</sup>) littermates was used for gene expression array studies performed as previously described.<sup>12</sup> The Analytical Genomics Core of Sanford-Burnham Medical Research Institute at Lake Nona performed hybridization to Affymetrix Mouse Gene 1.0 ST array. Five independent samples were analyzed. The Affymetrix probe level data was processed using Robust Multi-Array Analysis (RMA) as implemented in the *affy* package to obtain normalized summary scores of expression for each probe set on each array. *EBarrays* was used to identify genes differentially expressed between  $\alpha\beta$ <sup>-/-</sup> and  $\alpha$ <sup>-/-</sup> hearts.<sup>13,14</sup> The list of genes with posterior probabilities of differential expression greater than 0.95 (expected FDR less than 5%) was considered a regulated gene. For pathway analysis, the filtered data sets were uploaded into Ingenuity Pathway Analysis (IPA) software and biopathways were reviewed using the canonical pathways defined by IPA.

### *Cardiac myocyte cell culture*

Ventricles were removed from 0.5 day old SD rats, minced, and digested 16-20 hours in 500ug/ml trypsin at 4°C. After trypsin inhibition, the tissue was subsequently digested in 300U/ml collagenase (Worthington Biochemical Corporation) for 45 min at 37°C. After mechanical disruption and straining, the cells were pooled in Dulbecco’s modified Eagle’s medium containing 10% horse serum, 5% fetal calf serum, 0.10 mM 5-bromo-2’-deoxyuridine, 2 mM L-glutamine and plated into 6 well plates pre-treated with gelatin (about 800k cells per well of a 6 well plate). After 24 hours, the cell medium was switched to serum-free Dulbecco’s modified Eagle’s medium containing 0.10 mM 5-bromo-2’-deoxyuridine, 10  $\mu$ g/ml insulin, 10  $\mu$ g/ml transferrin (Sigma), 1 mg/ml fatty acid-free BSA, and 2 mM L-glutamine.

### *Adenoviral infection*

The adenoviral shRNA vectors for PGC-1 $\alpha$ ,<sup>15</sup> PGC-1 $\beta$ <sup>16</sup> and ERR $\alpha$ <sup>17</sup> were generous gifts from Dr. Montminy (The Salk Institute), Dr. Spiegelman (Harvard University) and Dr. McDonnell (Duke University) respectively. The adenoviral expression vectors for PGC-1 $\alpha$  and PGC-1 $\beta$  overexpression were previously described.<sup>2</sup> H9c2 cells were infected with adenovirus 4 days after differentiation and harvested 40-48 hours post-infection. Primary neonatal rat cardiac myocytes (NRCM) were infected with adenovirus 24 hours after differentiation and harvested 72 hours post-infection. The following adenoviral vectors encoding microRNAs were generated by the Zorzano Lab using the method previously described for Ad-miR2Mfn2:<sup>18</sup> Ad-miRct (encoding for a control miRNA), Ad-miR1Opa1 (encoding for 2 miRNAs against Opa1) and Ad-miR1Mfn1 (encoding 2 miRNAs against Mfn1).

### *Cell transfection and luciferase reporter assays*

pcDNA3.1-myc/his.PGC-1 $\alpha$ <sup>19,20</sup> and pcDNA3.1-ERR $\alpha$ ,<sup>28</sup> and pCATCH-PGC-1 $\beta$ <sup>21</sup> have been described previously.

The mouse *Mfn1* (mMfn1) gene promoter deletion series was generated by PCR amplification from C57BL/6J genomic DNA followed by cloning into the pGL3 Basic firefly luciferase reporter plasmid (Promega, Madison, WI) using Kpn1 and HindIII sites. The following forward primers: 5’-AGTGCTCAGGAATACAAGAATG-3’ (mMfn1.Luc.2996/+492); 5’-AGAGATGCCAAGGCAGGAAGTGA-3’ (mMfn1.Luc.2299/+492, and mMfn1.Luc.2299/+70). The following reverse primers were used: 5’-CTTGAAGCCTTCCTTCATGCC-3’ (mMfn1.Luc.2996/+492 and mMfn1.Luc.2299/+492); 5’-GAGCTGTGGTTGCTGGGT-3’ (mMfn1.Luc.2299/+70). The (Mfn1ERR-RE)<sub>2</sub>.TK.Luc and (Mfn1ERR-RE)<sub>2mut</sub>.TK.Luc plasmids were constructed by ligation of

annealed oligonucleotides (wt sense strand 5'-GATCCACGTCCGGGGTGACCTTCGAGCTCCGGACG-3'; mut sense strand 5'-GATCCACGTCCGGGGTGATTTTCGAGCTCCGGACG-3') into the BamHI site upstream of the thymidine kinase (TK) promoter of the pGL2-TK.Luc reporter plasmid. The sequence is based on the conserved ERR $\alpha$  site identified +110 downstream of the *Mfn1* transcription start site.

Transient transfections in C2C12 and 10T1/2 cells were performed using Attractene (Qiagen) per the manufacturer's protocol. Per well of 24 well plate, 330 ng of reporter was cotransfected with 133 ng or 33 ng of nuclear receptor expression vectors (for PGC-1 $\alpha$  and ERR $\alpha$  respectively), and 33 ng of CMV promoter-driven *Renilla* luciferase (pRL-CMV, Promega) to control for transfection efficiency. Transfections were done 24 hours after cells were plated. C2C12 cells were switched to differentiation media 24 hours after transfection. 96 hours after transfection for C2C12 cells, and 24 hours after transfection for 10T1/2 cells, luciferase assay was performed using Dual-Glo (Promega) according to the manufacturer's recommendations. All transfection data are presented as the mean  $\pm$  SEM for at least three separate transfection experiments done in triplicate.

#### *Chromatin immunoprecipitation (ChIP) assays*

ChIP assays were performed as described.<sup>22,23</sup> Briefly, differentiated H9c2 myotubes were cross-linked with 1% formaldehyde (10 min), and cells were collected and lysed. Chromatin fragmentation was performed by sonication using a Bioruptor (Diagenode). Sheared protein-DNA complexes were immunoprecipitated by using anti-ERR $\alpha$ ,<sup>22</sup> anti-PGC-1 $\alpha$ ,<sup>22,24</sup> or Rabbit IgG control (Sigma). Following reversal of cross-linking, DNA was isolated (QIAquick PCR purification kit, Qiagen). Isolated fragments were amplified by PCR (Stratagene MX3005P detection system) to detect the enrichment of amplicons corresponding to a 100-bp region encompassing the ERR response element of the *rMfn1* gene promoter or a 190-bp region of a distal region of the *rGLUT4* gene (negative control). Specific oligonucleotide primers for target regions are listed in Online Table I. Quantitative analysis was performed by the standard curve method and normalized to IgG control.

#### *Antibodies and Western immunoblotting studies*

Western immunoblotting studies were performed with cardiac tissue lysates as previously described.<sup>25</sup> Detection was performed by measuring the chemiluminescent signal as assayed by SuperSignal Ultra (Pierce). Band intensities were quantified using the ChemiDoc (Bio-Rad) or FluorChemQ (Alpha Innotech). The following antibodies were used: Mouse monoclonal anti-DLP1 (DRP-1) (BD Transduction Laboratories #611112); Mouse monoclonal anti-OPA1 (BD Transduction Laboratories #612606); Rabbit polyclonal anti-Mfn2 was generated by the Zorzano lab; Rabbit polyclonal anti-Fis1 (BioVision #3491R-100); Chicken polyclonal anti-Mfn1 (Abnova #PAB12166); VDAC/porin (Abcam #ab15895); S6 ribosomal protein (S6RP) (Cell Signaling Technology #2217S); Complex I subunit 8 kDa (MitoSciences #MS109); Complex II 70kDa Fp subunit (Invitrogen #459200); COX IV (Abcam #ab14744).

#### *Cell culture*

H9c2, C2C12, and 10T1/2 cells were maintained at 37°C under 5% CO<sub>2</sub> in Dulbecco's modified Eagle's medium (DMEM) supplemented with 10% fetal bovine serum (FBS). For experiments requiring myotube formation, C2C12 or H9c2 were re-plated onto gelatin-coated plates and maintained for 4-6 days in 2% horse serum or 1% FBS respectively. H9c2 and C2C12 myotubes were infected at a multiplicity of infection sufficient to infect >95% of the cells based on GFP fluorescence with minimal cell death.

Cardiac myocytes were prepared from 0.5-day-old Crl:CD(SD) rats using the Neonatal Cardiomyocyte Isolation System (Worthington Biochemical Corporation) according to the manufacturer's directions as described.<sup>26</sup>

*Statistical analyses*

Data were analyzed by Student's *t*-test (two-tailed), *t*-test using the Holm-Sidak method (% fibrosis), Log-rank (% survival), or one-way ANOVA coupled to a Fisher's least significant difference (LSD) post-hoc test as appropriate. Data represent the mean  $\pm$  standard error of the mean (SEM), with a statistically significant difference defined as a value of  $p < 0.05$ .

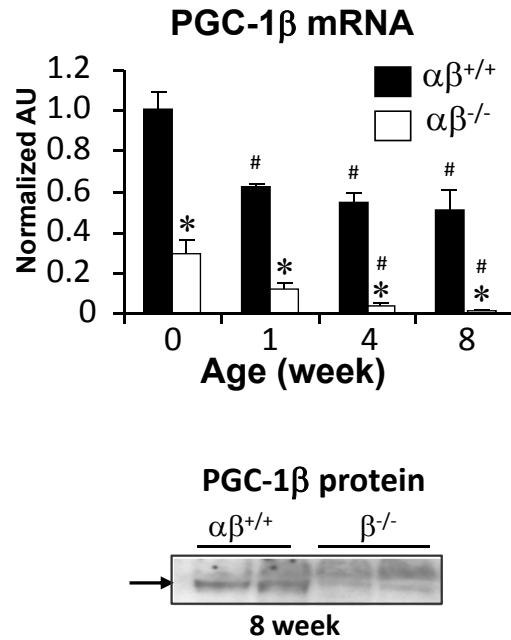

**Online Figure I. Evidence for disruption of PGC-1 $\beta$  gene expression in PGC-1 $\alpha^{-/-}\beta^{f/f/MCK-Cre}$  heart.** PGC-1 $\beta$  mRNA levels determined by qRT-PCR from heart at several age points in PGC-1 $\beta^{f/f}$  ( $\alpha\beta^{+/+}$ ) vs. PGC-1 $\alpha^{-/-}\beta^{f/f/MCK-Cre}$  ( $\alpha\beta^{-/-}$ ) mice. \* $p < 0.05$  relative to  $\alpha\beta^{+/+}$ ; # $p < 0.05$  relative to DOB (week 0) of the corresponding genotype. A representative Western blot using a PGC-1 $\beta$  antibody is shown at the bottom.

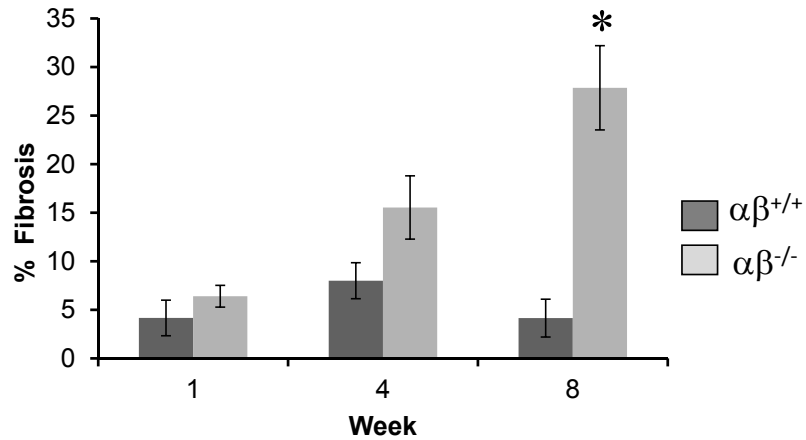

**Online Figure II. Quantification of fibrosis in PGC-1 $\alpha^{-/-}\beta^{fl/fl}$ /MCK-Cre hearts.** The percent of tissue exhibiting fibrosis was determined using Masson's trichrome staining. Quantification of the fibrotic areas was conducted using Halo software (see Supplemental Methods). The area of fibrotic tissue (blue stain) was calculated as a percent of the entire field of tissue (% Fibrosis). \* $p < 0.05$  compared to  $\alpha\beta^{+/+}$ .

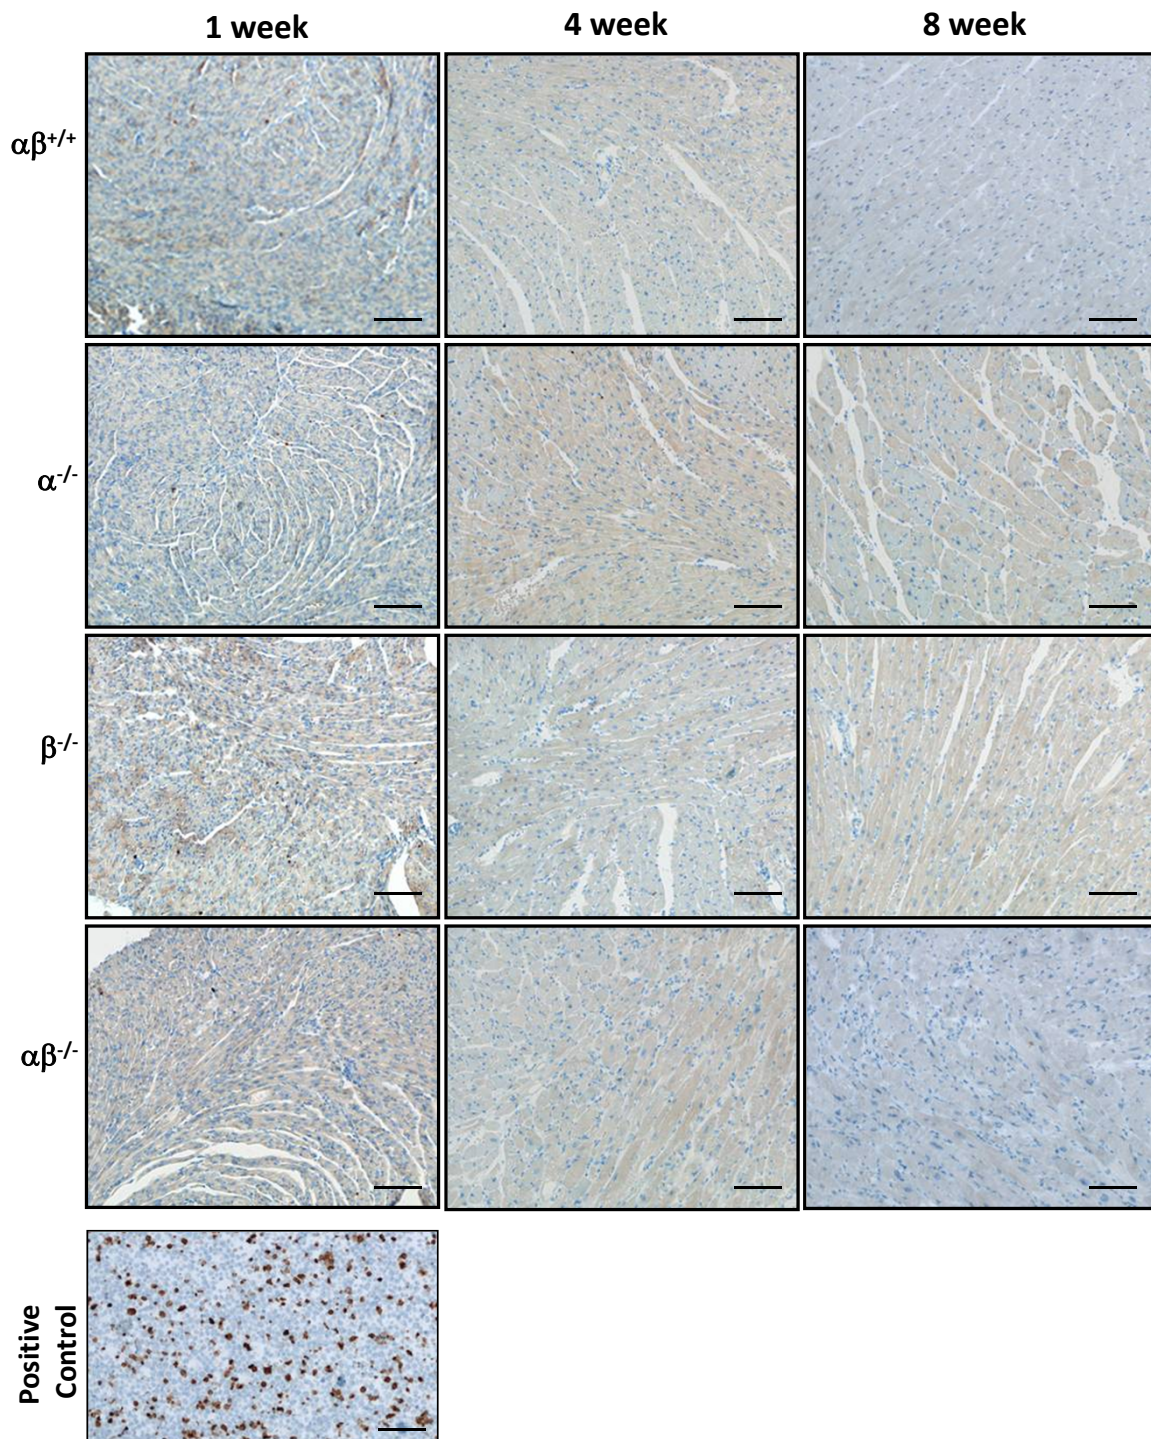

**Online Figure III. Caspase staining of PGC-1 $\alpha^{-/-}\beta^{f/f}/MCK-Cre$  heart.** Representative histologic images of myocardial LV sections from 1, 4, and 8 week old PGC-1 $\beta^{f/f}$  ( $\alpha\beta^{+/+}$ ), PGC-1 $\alpha^{-/-}$  ( $\alpha^{-/-}$ ), PGC-1 $\beta^{f/f}/MCK-Cre$  ( $\beta^{-/-}$ ) and PGC-1 $\alpha^{-/-}\beta^{f/f}/MCK-Cre$  ( $\alpha\beta^{-/-}$ ) mice stained using a cleaved Caspase 3 (Asp175) antibody. Etoposide-treated Jurkat cells are shown as a positive control. Scale bars shown are 100  $\mu$ m.



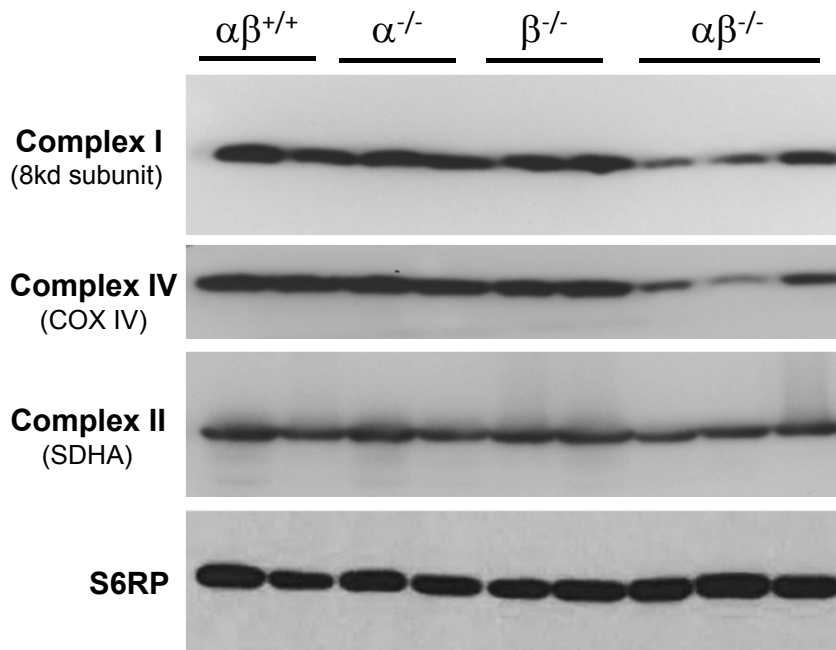

**Online Figure IV. Reduced levels of Complex I and IV subunits in  $PGC-1\alpha^{-/-}\beta^{fl/fl}MCK-Cre$  hearts.**

Representative Western blot analyses performed using protein extracts prepared from 8 week-old mouse heart ventricle tissue homogenate from genotypes denoted at the top. S6 ribosomal protein (S6RP) was used as a non-mitochondrial protein loading control.

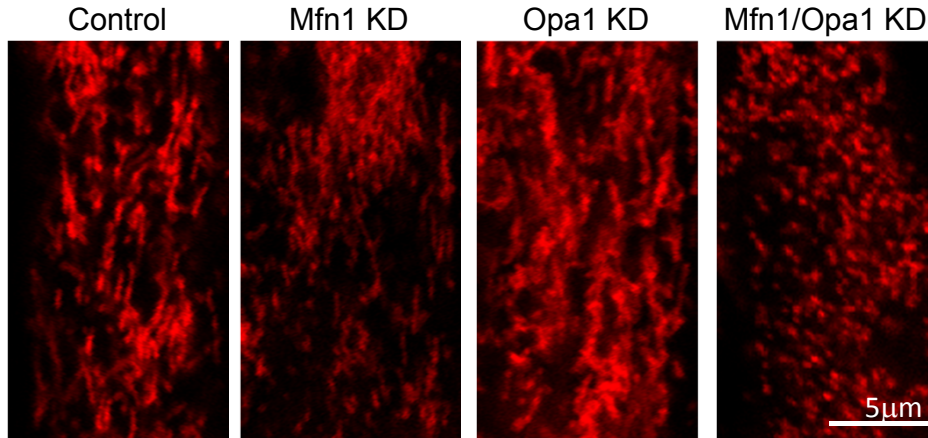

**Online Figure V. Opa1 and Mfn1 are required for maintaining normal mitochondrial morphology in C2C12 myotubes.** C2C12 myocytes were transduced with adenovirus encoding microRNAs that target Opa1 (78% decrease) and *Mfn1* (66% decrease) prior to differentiation followed by imaging with confocal microscopy after 3 days of differentiation. MitoTracker Red was used to stain the mitochondria. A single representative Z slice is shown. Note the marked fragmentation in the *Mfn1/Opa1* KD condition.

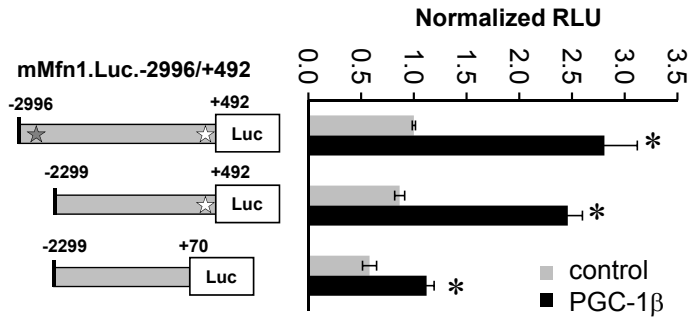

**Online Figure VI. PGC-1 $\beta$  activates the *Mfn1* promoter.** Serial deletion reporter constructs (mMfn1.Luc series) were cotransfected into C2C12 myocytes with a PGC-1 $\beta$  expression vector (pCATCH-PGC-1 $\beta$ ; black bars) or a vector backbone control (pcDNA3.1; gray bars). The bars represent mean luciferase activity (normalized relative light units, RLU)  $\pm$ SEM. Gray (-2826) and white (+110) stars denote the position of putative ERR sites. \*p<0.05 compared to empty vector.

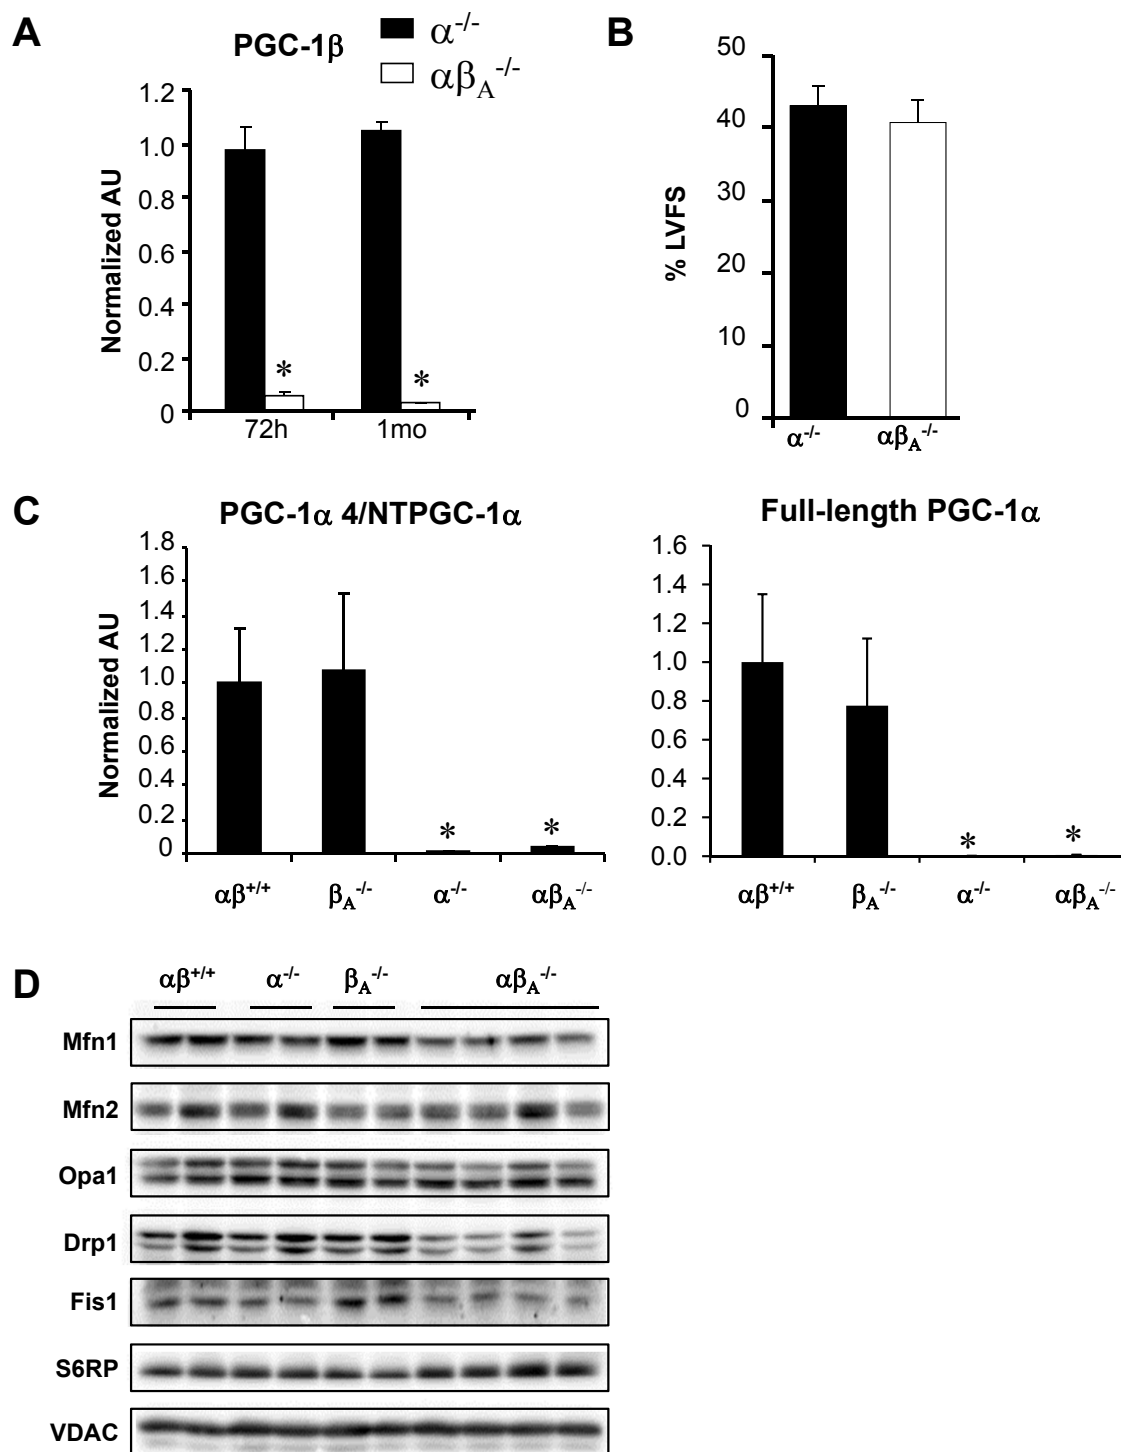

**Online Figure VII. PGC-1 $\alpha^{-/-}\beta^{fl/fl}/MerCre$  mice exhibit normal cardiac function.** (A) PGC-1 $\beta$  mRNA levels were determined in hearts of PGC-1 $\alpha^{-/-}\beta^{fl/fl}/MerCre$  ( $\alpha\beta_A^{-/-}$ ) or control PGC-1 $\alpha^{-/-}$  ( $\alpha^{-/-}$ ) mice 72 hours or 1 month after tamoxifen injection. (B) Left ventricular fractional shortening (LVFS) in adult heart was determined via echocardiography on 12 week old female PGC-1 $\alpha^{-/-}$  ( $\alpha^{-/-}$ ) or PGC-1 $\alpha^{-/-}\beta^{fl/fl}/MerCre$  ( $\alpha\beta_A^{-/-}$ ) mice one month after tamoxifen injection. Bars represent mean  $\pm$  SEM from 4 animals per group. (C) Levels of full-length and two alternatively spliced shorter PGC-1 $\alpha$  transcripts [PGC-1 $\alpha$ 4<sup>9</sup> and NT-PGC-1 $\alpha$ 10] in hearts of 2-3 month old PGC-1 $\alpha\beta^{+/+}$  ( $\alpha\beta^{+/+}$ ), PGC-1 $\beta^{fl/fl}/MerCre$  ( $\beta_A^{-/-}$ ), PGC-1 $\alpha^{-/-}$  ( $\alpha^{-/-}$ ), and PGC-1 $\alpha^{-/-}\beta^{fl/fl}/MerCre$  ( $\alpha\beta_A^{-/-}$ ) mice, 1 month after injection of vehicle or tamoxifen (as described in Methods) using qRT-PCR. PGC-1 $\alpha$ /NT-PGC-1 $\alpha$  primers are in Exon 5 (forward primer) and Exon 7a (reverse primer). Exon 7a is present in PGC-1 $\alpha$ 4 and NT-PGC-1 $\alpha$ , but absent from full-length PGC-1 $\alpha$ . Primers for full-length PGC-1 $\alpha$  are located in Exon 5 (forward primer) and across the boundary between Exon 6 and 7b (reverse primer). The exon boundary between Exon 6 and 7b exists only in full-length PGC-1 $\alpha$ , but not in PGC-1 $\alpha$ 4 or in NT-PGC-1 $\alpha$ . For sequences refer to Supplemental Table 1. (D) Representative Western blots assessing levels of fission/fusion proteins in cardiac tissue in 2-3 month old mice across the four genotypes are shown. Samples were taken 1 month after injection with vehicle or tamoxifen (as described in Methods).

Online Table I. Primer Sequences for ChIP and qRT-PCR studies

|                                                                    | Forward                   | Reverse                   |
|--------------------------------------------------------------------|---------------------------|---------------------------|
| <b>Mfn1, rat (ChIP)</b>                                            | TGTGGTTGCTGGGTGACAGT      | CGGGTGGATTCCTACCTGGACA    |
| <b>GLUT4, rat (ChIP, -cont)</b>                                    | GACGGACACCTTCT            | CCACAGCCTAGCCA            |
| <b>PDK4, rat (ChIP, +cont)</b>                                     | AGATTGGCACCCTTGGGATAGGT   | ATGCGTGACATTGAGATGGCTCCT  |
| <b>Mfn1, mouse</b>                                                 | AGCCCAACATCTTCATTCTGAA    | CTTACAACCTTGAGCTCTTCTACCA |
| <b>Mfn1, rat</b>                                                   | AACTCGGAATCAACGCTGATGAA   | ATTCTGGCTCTGAAGCAGAAGCAT  |
| <b>Mfn2, mouse</b>                                                 | CATCAGTTACACCGGCTCTAACT   | GAGCCTCGACTTTCTTGTTCA     |
| <b>Mfn2, rat</b>                                                   | CTCAGGAGCAGCGGGTTTATTGTCT | TGTCGAGGGACCAGCATGTCTATCT |
| <b>Opa1, mouse</b>                                                 | CAGCTGGCAGAAGATCTCAAG     | TATGAGCAGGATTTTGACACA     |
| <b>Opa1, rat</b>                                                   | CAGCTGGCAGAAGATCTCAAG     | CATGAGCAGGATTTTGACACC     |
| <b>Fis1, mouse</b>                                                 | ACTGAGCCCCAGAACAAC        | TCAGGATTTGGACTTGGAG       |
| <b>Fis1, rat</b>                                                   | AAGAGCACGCAGTTTGAATACGCC  | TCTTTGCTACCTTTGGGCAACAGC  |
| <b>Drp1, mouse</b>                                                 | CTGACGCTTGTGGATTTACC      | CCCTTCCCATCAATACATCC      |
| <b>Drp1, rat</b>                                                   | AAATGACCCTGCTACATGGAA     | AGAAAACCTTGAGATGGATTGG    |
| <b>PGC-1<math>\alpha</math>4/NTPGC-1<math>\alpha</math>, mouse</b> | TCACACCAAACCCACAGAAA      | CTGGAAGATATGGCACAT        |
| <b>PGC-1<math>\alpha</math> (full-length), mouse</b>               | TGCCATTGTTAAGACCGAG       | ACCCTTGGGGTCATTTGG        |
| <b>PGC-1<math>\alpha</math> (all isoforms), mouse</b>              | AACCGCAGTCGCAACATG        | GTTGCTCAATAGTCTTGTTCTCA   |
| <b>PGC-1<math>\alpha</math>, rat</b>                               | CGATGACCCTCCTCACACCA      | TTACCTTGAGCATGTTGCG       |
| <b>PGC-1<math>\beta</math>, mouse</b>                              | TCCAGAAGTCAGCGGCCTTGTGTCA | CTCTGGGACAGGGCAGCACCGA    |
| <b>PGC-1<math>\beta</math>, rat</b>                                | TGGATGAGCTTTCCTGCTGCA     | GGTGCCATCCACCTTGACAC      |
| <b>ERR<math>\alpha</math>, mouse</b>                               | AGGAGTACGTCCTGCTG         | CCTCAGCATCTTCAATG         |
| <b>ERR<math>\alpha</math>, rat</b>                                 | TTCGGCGGCTGCAAGCCC        | TCCACAGCCTCAGCATCTTCAATGT |
| <b>Cre</b>                                                         | GCCACGACCAAGTGACAGC       | TGCACGTTACCGGCATC         |
| <b>36B4, mouse</b>                                                 | ATCCCTGACGCACCGCCGTGA     | TGCATCTGCTTGGAGCCCACGTT   |
| <b>36B4, rat</b>                                                   | CACCTTCCCCTGGCTGAA        | TCCTCCGACTCTTCCTTTGC      |

**Online Table II. Echocardiographic Measurements**

| Measure               | $\alpha\beta^{+/+}$ | $\alpha^{-/-}$ | $\beta^{-/-}$ | $\alpha\beta^{-/-}$ |
|-----------------------|---------------------|----------------|---------------|---------------------|
| 1 week (mixed gender) |                     |                |               |                     |
| HR (bpm)              | 448.00 ±24.96       | 516.75 ±39.56  | 502.60 ±8.42  | 445.17 ±11.16       |
| LVPWd (mm)            | 0.57 ±0.02          | 0.52 ±0.05     | 0.64 ±0.05    | 0.49 ±0.04          |
| LVIDd (mm)            | 2.31 ±0.07          | 1.95 ±0.20*    | 2.20 ±0.12    | 1.76 ±0.04*         |
| LVPWs                 | 0.85 ±0.04          | 0.76 ±0.08     | 0.93 ±0.06    | 0.66 ±0.05*         |
| LVIDs                 | 1.34 ±0.07          | 1.13 ±0.18     | 1.25 ±0.12    | 1.19 ±0.09          |
| LVM (mg)              | 29.75 ±2.22         | 18.64 ±1.70*   | 31.01 ±5.36   | 15.43 ±1.23*        |
| LVMl                  | 6.95 ±0.77          | 4.66 ±0.53     | 5.25 ±0.60    | 3.24 ±0.23*         |
| RWT                   | 0.49 ±0.02          | 0.54 ±0.09     | 0.54 ±0.03    | 0.55 ±0.03*         |
| LVFS (%)              | 42.20 ±1.73         | 42.87 ±4.45    | 43.37 ±3.30   | 32.35 ±4.32*        |
| EF                    | 66.83 ±1.52         | 68.01 ±8.38    | 67.81 ±1.58   | 53.39 ±5.90         |
| CO                    | 3.52 ±0.27          | 2.53 ±0.19     | 3.42 ±0.51    | 1.68 ±0.17*         |
| 4 week (females)      |                     |                |               |                     |
| HR (bpm)              | 532.83 ±15.95       | 526.86 ±14.77  | 563.29 ±21.19 | 490.33 ±18.17       |
| LVPWd (mm)            | 0.69 ±0.05          | 0.57 ±0.02*    | 0.71 ±0.03    | 0.79 ±0.04          |
| LVIDd (mm)            | 3.38 ±0.15          | 3.57 ±0.09     | 3.34 ±0.05    | 3.64 ±0.21          |
| LVPWs                 | 1.00 ±0.05          | 0.89 ±0.04     | 1.06 ±0.03    | 0.89 ±0.08          |
| LVIDs                 | 2.11 ±0.18          | 2.26 ±0.15     | 1.89 ±0.06    | 2.92 ±0.26*         |
| LVM (mg)              | 81.10 ±9.62         | 63.96 ±4.47    | 79.01 ±2.66   | 102.24 ±15.90       |
| LVMl                  | 5.00 ±0.37          | 4.63 ±0.44     | 4.57 ±0.05    | 7.53 ±0.53*         |
| RWT                   | 0.44 ±0.03          | 0.33 ±0.01*    | 0.45 ±0.01    | 0.45 ±0.04          |
| LVFS (%)              | 37.95 ±2.89         | 37.06 ±3.16    | 43.31 ±1.43   | 20.43 ±3.21*        |
| EF                    | 64.64 ±1.53         | 63.98 ±4.72    | 71.99 ±0.87*  | 40.00 ±3.34*        |
| CO                    | 13.83 ±1.22         | 13.52 ±1.44    | 13.23 ±1.12   | 8.43 ±0.43*         |
| 8 week (females)      |                     |                |               |                     |
| HR (bpm)              | 609.83 ±15.10       | 523.29 ±28.18* | 601.60 ±11.07 | 516.50 ±17.04*      |
| LVPWd (mm)            | 0.80 ±0.04          | 0.62 ±0.05*    | 0.77 ±0.05    | 0.72 ±0.03          |
| LVIDd (mm)            | 3.28 ±0.07          | 3.62 ±0.12*    | 3.42 ±0.08    | 4.58 ±0.20*         |
| LVPWs                 | 1.07 ±0.05          | 0.93 ±0.07     | 1.13 ±0.03    | 0.80 ±0.04*         |
| LVIDs                 | 1.98 ±0.08          | 2.23 ±0.17     | 1.97 ±0.06    | 4.01 ±0.23*         |
| LVM (mg)              | 84.47 ±3.08         | 81.55 ±12.01   | 89.36 ±6.16   | 140.87 ±8.01*       |
| LVMl                  | 4.27 ±0.24          | 3.79 ±0.58     | 3.92 ±0.23    | 6.79 ±0.36*         |
| RWT                   | 0.50 ±0.03          | 0.37 ±0.03*    | 0.47 ±0.03    | 0.34 ±0.02*         |
| LVFS (%)              | 39.75 ±1.42         | 38.74 ±3.30    | 42.22 ±1.44   | 12.62 ±1.70*        |
| EF                    | 70.12 ±1.09         | 63.64 ±2.39*   | 68.11 ±1.55   | 23.41 ±1.45*        |
| CO                    | 12.92 ±0.62         | 14.25 ±1.45    | 13.83 ±1.68   | 11.18 ±0.87         |

\*p<0.05 relative to  $\alpha\beta^{+/+}$ 

N=4-12 per group

**Online Table III. Pathway analysis of Affymetrix GeneChip data from  $\alpha\beta^{-/-}$  vs.  $\alpha^{-/-}$  mice**

| <b>Ingenuity Canonical Pathways</b>                 | <b>p-value</b> |
|-----------------------------------------------------|----------------|
| Oxidative Phosphorylation                           | 3.98E-63       |
| Mitochondrial Dysfunction                           | 3.16E-49       |
| Ubiquinone Biosynthesis                             | 1.26E-33       |
| Valine, Leucine and Isoleucine Degradation          | 2.51E-20       |
| Citrate Cycle                                       | 1.00E-18       |
| Propanoate Metabolism                               | 3.98E-14       |
| Butanoate Metabolism                                | 7.94E-12       |
| Pyruvate Metabolism                                 | 1.02E-07       |
| Alanine and Aspartate Metabolism                    | 1.17E-07       |
| $\beta$ -alanine Metabolism                         | 2.00E-07       |
| Glycolysis/Gluconeogenesis                          | 1.55E-05       |
| Phenylalanine, Tyrosine and Tryptophan Biosynthesis | 6.31E-05       |
| Lysine Degradation                                  | 9.77E-05       |
| Fatty Acid Metabolism                               | 1.95E-04       |
| Arginine and Proline Metabolism                     | 4.17E-04       |
| NRF2-mediated Oxidative Stress Response             | 4.90E-04       |
| Tryptophan Metabolism                               | 5.25E-04       |
| Synthesis and Degradation of Ketone Bodies          | 8.71E-04       |
| Ascorbate and Aldarate Metabolism                   | 1.29E-03       |
| Purine Metabolism                                   | 1.38E-03       |
| Aryl Hydrocarbon Receptor Signaling                 | 3.63E-03       |
| Nucleotide Sugars Metabolism                        | 5.13E-03       |
| Pentose and Glucuronate Interconversions            | 6.03E-03       |
| Glyoxylate and Dicarboxylate Metabolism             | 7.59E-03       |
| Tyrosine Metabolism                                 | 9.33E-03       |
| Stilbene, Coumarine and Lignin Biosynthesis         | 9.33E-03       |
| Phenylalanine Metabolism                            | 1.02E-02       |
| Aldosterone Signaling in Epithelial Cells           | 1.07E-02       |
| Glycine, Serine and Threonine Metabolism            | 1.35E-02       |
| Valine, Leucine and Isoleucine Biosynthesis         | 1.35E-02       |
| Glutamate Metabolism                                | 2.19E-02       |
| LPS/IL-1 Mediated Inhibition of RXR Function        | 2.82E-02       |
| Histidine Metabolism                                | 2.88E-02       |
| Cholecystokinin/Gastrin-mediated Signaling          | 3.63E-02       |
| G Beta Gamma Signaling                              | 4.57E-02       |
| Chemokine Signaling                                 | 4.68E-02       |
| VEGF Signaling                                      | 4.79E-02       |

p<0.05 was used as a cutoff

**Online Table IV. Pathway analysis of Affymetrix GeneChip data from  $\alpha\beta^{-/-}$  vs.  $\alpha^{-/-}$  mice**

| <b>Fatty Acid Metabolism</b>     |                                                                                          |             |
|----------------------------------|------------------------------------------------------------------------------------------|-------------|
| Symbol                           | Entrez Gene Name                                                                         | Fold Change |
| ACAD11                           | acyl-CoA dehydrogenase family, member 11                                                 | -1.333      |
| ACADS                            | acyl-CoA dehydrogenase, C-2 to C-3 short chain                                           | -1.248      |
| ACADSB                           | acyl-CoA dehydrogenase, short/branched chain                                             | -1.435      |
| ACADVL                           | acyl-CoA dehydrogenase, very long chain                                                  | -1.580      |
| ADHFE1                           | alcohol dehydrogenase, iron containing, 1                                                | -1.383      |
| ALDH1A2                          | aldehyde dehydrogenase 1 family, member A2                                               | 1.550       |
| ALDH2                            | aldehyde dehydrogenase 2 family (mitochondrial)                                          | -1.245      |
| ALDH4A1                          | aldehyde dehydrogenase 4 family, member A1                                               | -1.318      |
| AUH                              | AU RNA binding protein/enoyl-CoA hydratase                                               | -1.449      |
| ECHS1                            | enoyl CoA hydratase, short chain, 1, mitochondrial                                       | -1.786      |
| EHHADH                           | enoyl-CoA, hydratase/3-hydroxyacyl CoA dehydrogenase                                     | -1.495      |
| GCDH                             | glutaryl-CoA dehydrogenase                                                               | -1.401      |
| HADH                             | hydroxyacyl-CoA dehydrogenase                                                            | -1.242      |
| SLC27A1                          |                                                                                          | 16 -1.370   |
| <b>Citric Acid Cycle</b>         |                                                                                          |             |
| Symbol                           | Entrez Gene Name                                                                         | Fold Change |
| ACO2                             | aconitase 2, mitochondrial                                                               | -1.595      |
| CLYBL                            | citrate lyase beta like                                                                  | -1.258      |
| CS                               | citrate synthase                                                                         | -1.297      |
| Csl                              | citrate synthase like                                                                    | -1.280      |
| DLD                              | dihydrolipoamide dehydrogenase                                                           | -1.905      |
| DLST                             | dihydrolipoamide S-succinyltransferase (E2 component of 2-oxo-glutarate complex)         | -2.119      |
| FH                               | fumarate hydratase                                                                       | -1.869      |
| IDH2                             | isocitrate dehydrogenase 2 (NADP+), mitochondrial                                        | -1.258      |
| IDH3A                            | isocitrate dehydrogenase 3 (NAD+) alpha                                                  | -1.399      |
| IDH3B                            | isocitrate dehydrogenase 3 (NAD+) beta                                                   | -1.965      |
| IDH3G                            | isocitrate dehydrogenase 3 (NAD+) gamma                                                  | -1.536      |
| MDH2                             | malate dehydrogenase 2, NAD (mitochondrial)                                              | -1.689      |
| OGDH                             | oxoglutarate (alpha-ketoglutarate) dehydrogenase (lipoamide)                             | -1.326      |
| PC                               | pyruvate carboxylase                                                                     | -1.271      |
| SDHA                             | succinate dehydrogenase complex, subunit A, flavoprotein (Fp)                            | -1.828      |
| SDHB                             | succinate dehydrogenase complex, subunit B, iron sulfur (Ip)                             | -2.398      |
| SDHC                             | succinate dehydrogenase complex, subunit C, integral membrane protein, 15kDa             | -1.880      |
| SDHD                             | succinate dehydrogenase complex, subunit D, integral membrane protein                    | -2.257      |
| SUCLA2                           | succinate-CoA ligase, ADP-forming, beta subunit                                          | -1.473      |
| SUCLG1                           | succinate-CoA ligase, alpha subunit                                                      | -1.792      |
| <b>Oxidative Phosphorylation</b> |                                                                                          |             |
| Symbol                           | Entrez Gene Name                                                                         | Fold Change |
| ATP5A1                           | ATP synthase, H+ transporting, mitochondrial F1 complex, alpha subunit 1, cardiac muscle | -1.495      |
| ATP5C1                           | ATP synthase, H+ transporting, mitochondrial F1 complex, gamma polypeptide 1             | -1.642      |
| ATP5D                            | ATP synthase, H+ transporting, mitochondrial F1 complex, delta subunit                   | -1.353      |
| ATP5E                            | ATP synthase, H+ transporting, mitochondrial F1 complex, epsilon subunit                 | -1.701      |
| ATP5F1                           | ATP synthase, H+ transporting, mitochondrial Fo complex, subunit B1                      | -1.730      |
| ATP5G1                           | ATP synthase, H+ transporting, mitochondrial Fo complex, subunit C1 (subunit 9)          | -1.529      |
| ATP5G3                           | ATP synthase, H+ transporting, mitochondrial Fo complex, subunit C3 (subunit 9)          | -1.828      |
| ATP5I                            | ATP synthase, H+ transporting, mitochondrial Fo complex, subunit E                       | -2.632      |
| ATP5J2                           | ATP synthase, H+ transporting, mitochondrial Fo complex, subunit F2                      | -1.403      |
| ATP5O                            | ATP synthase, H+ transporting, mitochondrial F1 complex, O subunit                       | -2.237      |
| COX10                            | cytochrome c oxidase assembly homolog 10 (yeast)                                         | -1.684      |
| COX4I1                           | cytochrome c oxidase subunit IV isoform 1                                                | -1.996      |
| COX5A                            | cytochrome c oxidase subunit Va                                                          | -1.502      |
| COX5B                            | cytochrome c oxidase subunit Vb                                                          | -1.770      |
| COX6A1                           | cytochrome c oxidase subunit VIa polypeptide 1                                           | -1.435      |
| COX6B1                           | cytochrome c oxidase subunit VIb polypeptide 1 (ubiquitous)                              | -1.626      |
| COX7A1                           | cytochrome c oxidase subunit VIIa polypeptide 1 (muscle)                                 | -1.323      |
| COX7A2                           | cytochrome c oxidase subunit VIIa polypeptide 2 (liver)                                  | -1.730      |
| COX8A                            | cytochrome c oxidase subunit VIIIA (ubiquitous)                                          | -1.637      |
| CYC1                             | cytochrome c-1                                                                           | -2.222      |
| NDUFA1                           | NADH dehydrogenase (ubiquinone) 1 alpha subcomplex, 1, 7.5kDa                            | -1.805      |
| NDUFA11                          | NADH dehydrogenase (ubiquinone) 1 alpha subcomplex, 11, 14.7kDa                          | -1.266      |
| NDUFA12                          | NADH dehydrogenase (ubiquinone) 1 alpha subcomplex, 12                                   | -1.565      |
| NDUFA13                          | NADH dehydrogenase (ubiquinone) 1 alpha subcomplex, 13                                   | -1.493      |
| NDUFA2                           | NADH dehydrogenase (ubiquinone) 1 alpha subcomplex, 2, 8kDa                              | -1.357      |
| NDUFA4                           | NADH dehydrogenase (ubiquinone) 1 alpha subcomplex, 4, 9kDa                              | -1.949      |
| NDUFA5                           | NADH dehydrogenase (ubiquinone) 1 alpha subcomplex, 5, 13kDa                             | -2.347      |



|         |                                                                                   |        |
|---------|-----------------------------------------------------------------------------------|--------|
| NDUFA7  | NADH dehydrogenase (ubiquinone) 1 alpha subcomplex, 7, 14.5kDa                    | -1.323 |
| NDUFA8  | NADH dehydrogenase (ubiquinone) 1 alpha subcomplex, 8, 19kDa                      | -1.779 |
| NDUFA9  | NADH dehydrogenase (ubiquinone) 1 alpha subcomplex, 9, 39kDa                      | -2.088 |
| NDUFAB1 | NADH dehydrogenase (ubiquinone) 1, alpha/beta subcomplex, 1, 8kDa                 | -2.016 |
| NDUFB10 | NADH dehydrogenase (ubiquinone) 1 beta subcomplex, 10, 22kDa                      | -2.114 |
| NDUFB11 | NADH dehydrogenase (ubiquinone) 1 beta subcomplex, 11, 17.3kDa                    | -1.276 |
| NDUFB2  | NADH dehydrogenase (ubiquinone) 1 beta subcomplex, 2, 8kDa                        | -1.473 |
| NDUFB3  | NADH dehydrogenase (ubiquinone) 1 beta subcomplex, 3, 12kDa                       | -1.701 |
| NDUFB6  | NADH dehydrogenase (ubiquinone) 1 beta subcomplex, 6, 17kDa                       | -1.555 |
| NDUFB7  | NADH dehydrogenase (ubiquinone) 1 beta subcomplex, 7, 18kDa                       | -2.020 |
| NDUFB8  | NADH dehydrogenase (ubiquinone) 1 beta subcomplex, 8, 19kDa                       | -2.299 |
| NDUFB9  | NADH dehydrogenase (ubiquinone) 1 beta subcomplex, 9, 22kDa                       | -1.927 |
| NDUFC1  | NADH dehydrogenase (ubiquinone) 1, subcomplex unknown, 1, 6kDa                    | -1.437 |
| NDUFC2  | NADH dehydrogenase (ubiquinone) 1, subcomplex unknown, 2, 14.5kDa                 | -1.414 |
| NDUFS1  | NADH dehydrogenase (ubiquinone) Fe-S protein 1, 75kDa (NADH-coenzyme Q reductase) | -2.083 |
| NDUFS2  | NADH dehydrogenase (ubiquinone) Fe-S protein 2, 49kDa (NADH-coenzyme Q reductase) | -1.957 |
| NDUFS3  | NADH dehydrogenase (ubiquinone) Fe-S protein 3, 30kDa (NADH-coenzyme Q reductase) | -1.718 |
| NDUFS4  | NADH dehydrogenase (ubiquinone) Fe-S protein 4, 18kDa (NADH-coenzyme Q reductase) | -1.477 |
| NDUFS5  | NADH dehydrogenase (ubiquinone) Fe-S protein 5, 15kDa (NADH-coenzyme Q reductase) | -1.376 |
| NDUFS6  | NADH dehydrogenase (ubiquinone) Fe-S protein 6, 13kDa (NADH-coenzyme Q reductase) | -1.460 |
| NDUFS7  | NADH dehydrogenase (ubiquinone) Fe-S protein 7, 20kDa (NADH-coenzyme Q reductase) | -1.304 |
| NDUFS8  | NADH dehydrogenase (ubiquinone) Fe-S protein 8, 23kDa (NADH-coenzyme Q reductase) | -1.603 |
| NDUFV1  | NADH dehydrogenase (ubiquinone) flavoprotein 1, 51kDa                             | -2.227 |
| NDUFV2  | NADH dehydrogenase (ubiquinone) flavoprotein 2, 24kDa                             | -1.490 |
| NDUFV3  | NADH dehydrogenase (ubiquinone) flavoprotein 3, 10kDa                             | -1.282 |
| PPA2    | pyrophosphatase (inorganic) 2                                                     | -1.408 |
| SDHA    | succinate dehydrogenase complex, subunit A, flavoprotein (Fp)                     | -1.828 |
| SDHB    | succinate dehydrogenase complex, subunit B, iron sulfur (Ip)                      | -2.398 |
| SDHC    | succinate dehydrogenase complex, subunit C, integral membrane protein, 15kDa      | -1.880 |
| SDHD    | succinate dehydrogenase complex, subunit D, integral membrane protein             | -2.257 |
| UQCR10  | ubiquinol-cytochrome c reductase, complex III subunit X                           | -1.626 |
| UQCR11  | ubiquinol-cytochrome c reductase, complex III subunit XI                          | -1.996 |
| UQCRC1  | ubiquinol-cytochrome c reductase core protein I                                   | -1.792 |
| UQCRC2  | ubiquinol-cytochrome c reductase core protein II                                  | -1.645 |
| UQCRFS1 | ubiquinol-cytochrome c reductase, Rieske iron-sulfur polypeptide 1                | -2.227 |
| UQCRHL  | ubiquinol-cytochrome c reductase hinge protein                                    | -2.041 |
| UQCRQ   | ubiquinol-cytochrome c reductase, complex III subunit VII, 9.5kDa                 | -2.110 |

---

## Supplemental References

1. Zechner C, Lai L, Zechner JF, Geng T, Yan Z, Rumsey JW, Collija D, Chen Z, Wozniak DF, Leone TC, Kelly DP. Total skeletal muscle PGC-1 deficiency uncouples mitochondrial derangements from fiber type determination and insulin sensitivity. *Cell Metab.* 2010;12:633-642.
2. Lai L, Leone TC, Zechner C, Schaeffer PJ, Kelly SM, Flanagan DP, Medeiros DM, Kovacs A, Kelly DP. Transcriptional coactivators PGC-1alpha and PGC-1beta control overlapping programs required for perinatal maturation of the heart. *Genes Dev.* 2008;22:1948-1961.
3. Bruning JC, Michael MD, Winnay JN, Hayashi T, Horsch D, Accili D, Goodyear LJ, Kahn CR. A muscle-specific insulin receptor knockout exhibits features of the metabolic syndrome of NIDDM without altering glucose tolerance. *Mol Cell.* 1998;2:559-569.
4. Leone TC, Lehman JJ, Finck BN, Schaeffer PJ, Wende AR, Boudina S, Courtois M, Wozniak DF, Sambandam N, Bernal-Mizrachi C, Chen Z, Holloszy JO, Medeiros DM, Schmidt RE, Saffitz JE, Abel ED, Semenkovich CF, Kelly DP. PGC-1alpha deficiency causes multi-system energy metabolic derangements: Muscle dysfunction, abnormal weight control and hepatic steatosis. *PLoS Biol.* 2005;3:e101.
5. Sahn DJ, DeMaria A, Kisslo J, Weyman A. Recommendations regarding quantitation in M-mode echocardiography: Results of a survey of echocardiographic measurements. *Circulation.* 1978;58:1072-1083.
6. Gardin JM, Siri FM, Kitsis RN, Edwards JG, Leinwand LA. Echocardiographic assessment of left ventricular mass and systolic function in mice. *Circ Res.* 1995;76:907-914.
7. Oh JK, Seward JB, Takjick AJ. *The Echo Manual.* Philadelphia, PA: Lippincott Williams and Wilkins; 1999.
8. Boehm EA, Jones BE, Radda GK, Veech RL, Clarke K. Increased uncoupling proteins and decreased efficiency in palmitate-perfused hyperthyroid rat heart. *Am J Physiol Heart Circ Physiol.* 2001;280:H977-983.
9. Schaeffer PJ, Desantiago J, Yang J, Flagg TP, Kovacs A, Weinheimer CJ, Courtois M, Leone TC, Nichols CG, Bers DM, Kelly DP. Impaired contractile function and calcium handling in hearts of cardiac-specific calcineurin b1-deficient mice. *Am J Physiol Heart Circ Physiol.* 2009;297:H1263-1273.
10. Saks VA, Veksler VI, Kuznetsov AV, Kay L, Sikk P, Tiivel T, Tranqui L, Olivares J, Winkler K, Wiedemann F, Kunz WS. Permeabilized cell and skinned fiber techniques in studies of mitochondrial function in vivo. *Mol Cell Biochem.* 1998;184:81-100.
11. Frith MC, Fu Y, Yu L, Chen JF, Hansen U, Weng Z. Detection of functional DNA motifs via statistical over-representation. *Nucleic Acids Res.* 2004;32:1372-1381.
12. Huss JM, Torra IP, Staels B, Giguere V, Kelly DP. Estrogen-related receptor alpha directs peroxisome proliferator-activated receptor alpha signaling in the transcriptional control of energy metabolism in cardiac and skeletal muscle. *Mol Cell Biol.* 2004;24:9079-9091.
13. Taegtmeier H, Overturf ML. Effects of moderate hypertension on cardiac function and metabolism in the rabbit. *Hypertension.* 1988;11:416-426.
14. Pagliarini DJ, Calvo SE, Chang B, Sheth SA, Vafai SB, Ong SE, Walford GA, Sugiana C, Boneh A, Chen WK, Hill DE, Vidal M, Evans JG, Thorburn DR, Carr SA, Mootha VK. A mitochondrial protein compendium elucidates complex I disease biology. *Cell.* 2008;134:112-123.
15. Koo SH, Satoh H, Herzig S, Lee CH, Hedrick S, Kulkarni R, Evans RM, Olefsky J, Montminy M. PGC-1 promotes insulin resistance in liver through PPAR-alpha-dependent induction of TRB-3. *Nat Med.* 2004;10:530-534.
16. Lin J, Yang R, Tarr PT, Wu PH, Handschin C, Li S, Yang W, Pei L, Uldry M, Tontonoz P, Newgard CB, Spiegelman BM. Hyperlipidemic effects of dietary saturated fats mediated through PGC-1beta coactivation of SREBP. *Cell.* 2005;120:261-273.

17. Gaillard S, Grasfeder LL, Haeffele CL, Lobenhofer EK, Chu TM, Wolfinger R, Kazmin D, Koves TR, Muoio DM, Chang CY, McDonnell DP. Receptor-selective coactivators as tools to define the biology of specific receptor-coactivator pairs. *Mol Cell*. 2006;24:797-803.
18. Sebastian D, Hernandez-Alvarez MI, Segales J, Sorianello E, Munoz JP, Sala D, Waget A, Liesa M, Paz JC, Gopalacharyulu P, Oresic M, Pich S, Burcelin R, Palacin M, Zorzano A. Mitofusin 2 (Mfn2) links mitochondrial and endoplasmic reticulum function with insulin signaling and is essential for normal glucose homeostasis. *Proc Natl Acad Sci USA*. 2012;109:5523-5528.
19. Huss JM, Kopp RP, Kelly DP. Peroxisome proliferator-activated receptor coactivator-1alpha (PGC-1alpha) coactivates the cardiac-enriched nuclear receptors estrogen-related receptor-alpha and -gamma. Identification of novel leucine-rich interaction motif within PGC-1alpha. *J Biol Chem*. 2002;277:40265-40274.
20. Vega RB, Huss JM, Kelly DP. The coactivator PGC-1 cooperates with peroxisome proliferator-activated receptor alpha in transcriptional control of nuclear genes encoding mitochondrial fatty acid oxidation enzymes. *Mol Cell Biol*. 2000;20:1868-1876.
21. Lin J, Puigserver P, Donovan J, Tarr P, Spiegelman BM. Peroxisome proliferator-activated receptor gamma coactivator 1beta (PGC-1beta), a novel PGC-1-related transcription coactivator associated with host cell factor. *J Biol Chem*. 2002;277:1645-1648.
22. Wende AR, Huss JM, Schaeffer PJ, Giguere V, Kelly DP. PGC-1alpha coactivates PDK4 gene expression via the orphan nuclear receptor ERRalpha: A mechanism for transcriptional control of muscle glucose metabolism. *Mol Cell Biol*. 2005;25:10684-10694.
23. Yang J, Williams RS, Kelly DP. Bcl3 interacts cooperatively with peroxisome proliferator-activated receptor gamma (PPARgamma) coactivator 1alpha to coactivate nuclear receptors estrogen-related receptor alpha and PPARalpha. *Mol Cell Biol*. 2009;29:4091-4102.
24. Lehman JJ, Barger PM, Kovacs A, Saffitz JE, Medeiros DM, Kelly DP. Peroxisome proliferator-activated receptor gamma coactivator-1 promotes cardiac mitochondrial biogenesis. *J Clin Invest*. 2000;106:847-856.
25. Cresci S, Wright LD, Spratt JA, Briggs FN, Kelly DP. Activation of a novel metabolic gene regulatory pathway by chronic stimulation of skeletal muscle. *Am J Physiol*. 1996;270:C1413-1420.
26. Schilling J, Lai L, Sambandam N, Dey CE, Leone TC, Kelly DP. Toll-like receptor-mediated inflammatory signaling reprograms cardiac energy metabolism by repressing peroxisome proliferator-activated receptor gamma coactivator-1 signaling. *Circ Heart Fail*. 2011;4:474-482.
